# Supplementary material for: Assessment of the Genetic Diversity and Structure of the Korean Endemic Freshwater Fish Microphysogobio longidorsalis (Gobioninae) Using Microsatellite Markers: A First Glance from Population Genetics
Source: MDPI journal article supplement (doi:10.3390/genes15010069), 2024-01-04
Supplement: s1 [file s1]

**Table S1.** Sample sites information and number of individuals in the *M. longidorsalis*

| Location                | Site ID | Water system     | N  | Location               |
|-------------------------|---------|------------------|----|------------------------|
| Jecheon stream          | JC      | Namhangang River | 20 | 37°09'51"N 128°06'24"E |
| Hongjeongcheon stream   | PC      | Namhangang River | 20 | 37°36'58"N 128°22'27"E |
| Gapyeongcheon stream    | GP      | Bukhangang River | 20 | 37°49'48"N 127°31'03"E |
| Hongcheon River         | HC      | Bukhangang River | 20 | 37°40'48"N 127°51'30"E |
| Jojongicheon stream     | CP      | Bukhangang River | 20 | 37°43'56"N 127°25'15"E |
| Yeongpyeongcheon stream | PHC     | Imjingang River  | 20 | 38°03'35"N 127°23'14"E |

N: Number of samples.

**Table S2.** Summary microsatellite screening and raw data of long and short read sequencing in *M. longidorsalis*.

| Raw data                                       | Total reads | Total reads length (bp) |
|------------------------------------------------|-------------|-------------------------|
| Long reads raw data                            | 5,468,650   | 33,151,752,272          |
| Short reads raw data                           | 725,452,696 | 109,120,602,840         |
| Microsatellite search                          |             |                         |
| Contig                                         |             | 6,220                   |
| Total size of examined sequences (bp)          |             | 1,116,379,304           |
| Total number of identified SSRs                |             | 886,829                 |
| Number of SSR containing sequences             |             | 5,004                   |
| Number of sequences containing more than 1 SSR |             | 4,898                   |
| Number of SSRs present in compound formation   |             | 414,225                 |

**Table S3.** Microsatellite 19 loci information developed from *M. longidorsalis*

| Locus  | Primer sequence (5'→ 3')                                                   | Motif repeat | Product size (bp) | Dye | N  | N <sub>A</sub> | H <sub>O</sub> | H <sub>E</sub> | PIC   | GenBank Accession no. |
|--------|----------------------------------------------------------------------------|--------------|-------------------|-----|----|----------------|----------------|----------------|-------|-----------------------|
| Milo2  | F:<br>TGTAACGACGGCCAGTCCGAGAGCTGGATTCGA<br>CAA<br>R: TCCTGCTTCCAACCAAAGGT  | (AC)17       | 158               | FAM | 27 | 15             | 0.741          | 0.899          | 0.873 | OR722786              |
| Milo9  | F:<br>TGTAACGACGGCCAGTTCGACACTGGGTAAAA<br>ACTGT<br>R: GTGTTTTTCACCCAGTGTGA | (ATA)9       | 188               | FAM | 26 | 14             | 0.654          | 0.878          | 0.846 | OR722787              |
| Milo11 | F:<br>TGTAACGACGGCCAGTGGGACTTCAATGGGAG<br>GCAA<br>R: CAGCCCTGACTCATGAACGA  | (AC)10       | 202               | FAM | 27 | 13             | 0.519          | 0.912          | 0.886 | OR722788              |
| Milo13 | F:<br>TGTAACGACGGCCAGTATCTCCGCACACATCGA<br>CTC<br>R: TTAGCGTCTCCTGGGAGTGA  | (AC)12       | 208               | FAM | 27 | 7              | 0.815          | 0.776          | 0.726 | OR722789              |





|        |                                                                               |         |     |     |    |    |       |       |       |          |
|--------|-------------------------------------------------------------------------------|---------|-----|-----|----|----|-------|-------|-------|----------|
| Milo56 | F:<br>TGTAACGACGGCCAGTAGCAAGACCCTAGCAAC<br>CAC<br><br>R: TGAGTGGTTGCTACGCAGTT | (ATTG)6 | 309 | VIC | 26 | 8  | 0.654 | 0.662 | 0.624 | OR722800 |
| Milo61 | F:<br>TGTAACGACGGCCAGTAGCAGAGCACGTTACAC<br>ACA<br><br>R: CCCTAACCTCCACAGCGTT  | (AC)10  | 323 | VIC | 26 | 3  | 0.154 | 0.277 | 0.253 | OR722801 |
| Milo63 | F:<br>TGTAACGACGGCCAGTAACATGGCGGACAACA<br>AAGC<br><br>R: GAGGAGCTGGTTGAGAGTCG | (AGC)9  | 329 | VIC | 26 | 6  | 0.308 | 0.315 | 0.300 | OR722802 |
| Milo64 | F:<br>TGTAACGACGGCCAGTAATGATGCTCCCAGGCA<br>ACA<br><br>R: CATTCGGCTCCTCCTCCATC | (TGG)9  | 331 | VIC | 26 | 7  | 0.769 | 0.692 | 0.634 | OR722803 |
| Milo80 | F:<br>TGTAACGACGGCCAGTGGATAGTCTCACGCCTT<br>CGG<br><br>R: TTGTGCAGTCCATCAACCCA | (AC)13  | 365 | VIC | 26 | 11 | 0.577 | 0.851 | 0.813 | OR722804 |

---

N: Number of samples,  $N_A$ : Number of alleles,  $H_O$ : Observed heterozygosity,  $H_E$ : Expected heterozygosity, PIC: Polymorphic information content.
